# Supplementary material for: Repeatable, Inducible Micro-RNA-Based Technology Tightly Controls Liver Transgene Expression
Source: PubMed Central journal article supplement — Mol Ther Nucleic Acids. 2014 Jul 1;3(7):e172–. doi: 10.1038/mtna.2014.25 (PMC4121515; doi:10.1038/mtna.2014.25), 2014-07-01
Supplement: mtna201425x1.pdf [file mtna201425x1.pdf]

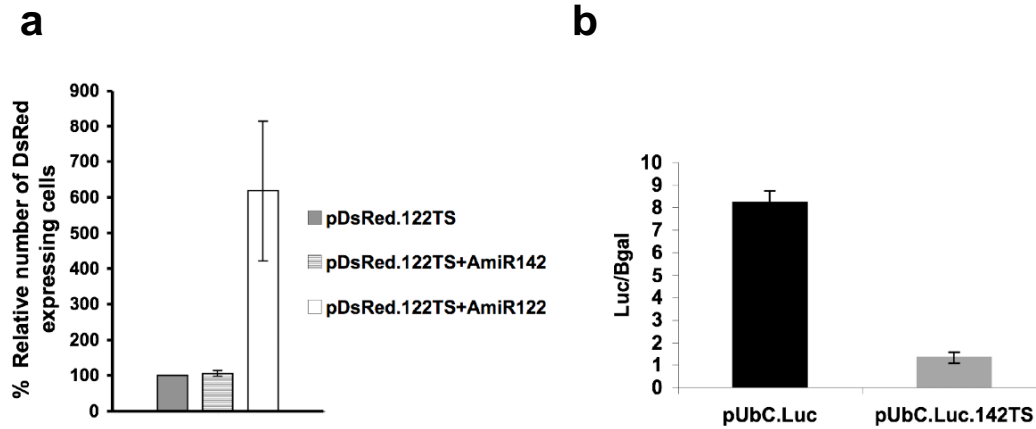

**Supplementary Figure S1.** Effects of miR-122 and miR-142-3p on plasmid expression in transfected cells. **(a)** Quantification of the miR-122, AmiR142 and AmiR122 effect on pDsRed.122TS plasmid expression in Huh7 cells. The DsRed expressing cells were counted from three different photomicrographs. Error bars represent standard deviation of triplicates. **(b)** Quantification of the miR-142-3p effect on UbC.Luc and UbC.Luc.142TS plasmid expression in U937 cells. The luciferase-expression plasmids were co-transfected with  $\beta$ -galactosidase (B-gal) expressing plasmids and the effect of the miR-142-3p was assayed as a ratio between luciferase and B-gal. Error bars represent standard deviation of triplicates.
