# Supplementary material for: Repeatable, Inducible Micro-RNA-Based Technology Tightly Controls Liver Transgene Expression
Source: PubMed Central journal article supplement — Mol Ther Nucleic Acids. 2014 Jul 1;3(7):e172–. doi: 10.1038/mtna.2014.25 (PMC4121515; doi:10.1038/mtna.2014.25), 2014-07-01
Supplement: mtna201425x2.pdf [file mtna201425x2.pdf]

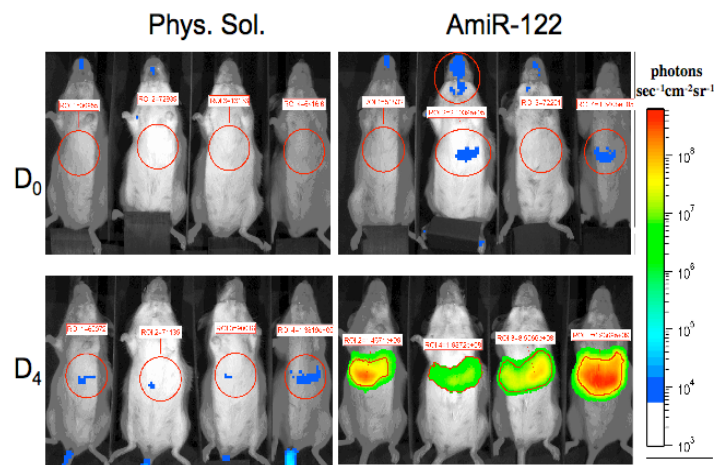

**Supplementary Figure S2.** Effect of AmiR122 administration on expression from plasmids containing miR-122 target sites. A number of 8 animals were pre-injected with pUbC.Luc.122TS.142TS. After 1 month, 4 animals/group were hydrodynamically injected with either 20 nmols of AmiR122 in physiological salt solution or with physiological salt solution only. (D0) represents day 0, before AmiR122 administration and D4 represents day 4 post treatment. The light signal coming from the animals are represented as different colors on a logarithmical scale.
