# Supplementary material for: Repeatable, Inducible Micro-RNA-Based Technology Tightly Controls Liver Transgene Expression
Source: PubMed Central journal article supplement — Mol Ther Nucleic Acids. 2014 Jul 1;3(7):e172–. doi: 10.1038/mtna.2014.25 (PMC4121515; doi:10.1038/mtna.2014.25), 2014-07-01
Supplement: mtna201425x3.pdf [file mtna201425x3.pdf]

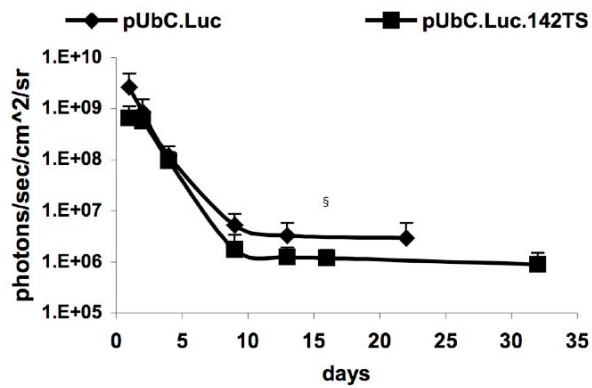

**Supplementary Figure S3.** *In vivo* luciferase expression profiles from pUbC.Luc plasmids containing, or lacking, target sites for miR-142-3p. NMRI mice were hydrodynamically injected with 5  $\mu$ g of plasmids with or without complementary target sites for miR-142-3p (pUbC.Luc.142TS or pUbC.Luc, respectively) and followed over time. Each value represents the average of the treated group (+SD). (a) Luciferase expression was followed over one month ( $n \geq 4$ ).
