# Supplementary material for: Repeatable, Inducible Micro-RNA-Based Technology Tightly Controls Liver Transgene Expression
Source: PubMed Central journal article supplement — Mol Ther Nucleic Acids. 2014 Jul 1;3(7):e172–. doi: 10.1038/mtna.2014.25 (PMC4121515; doi:10.1038/mtna.2014.25), 2014-07-01
Supplement: mtna201425x4.pdf [file mtna201425x4.pdf]

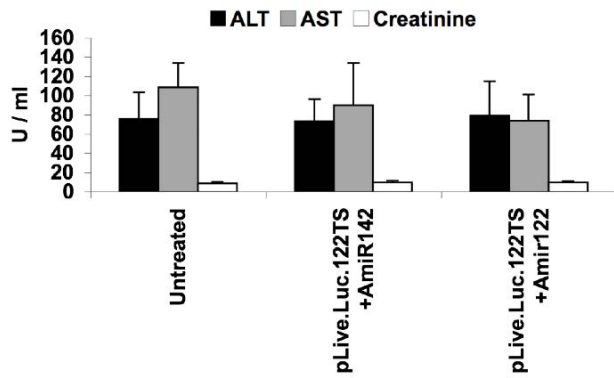

**Supplementary Figure S4.** Toxicity assay for mice treated with either AmiR142 or AmiR122. Serum from animals hydrodynamically injected with either 20 nmols of AmiR122 or AmiR142 was collected 3 days after antagomir delivery. The animals that receive AmiR122 or AmiR142 were hydrodynamically injected 1 month in advance with 5  $\mu$ g of pLive.Luc.122TS. AST, ALT and creatinin were measured and average values are plotted from at least 3 different animals (+SD).
